# Supplementary material
Source: publisher site journal article supplement (https://www.dovepress.com/article/436824)
Supplement: Supplementary file 1 [file get_supplementary_file.php]

**
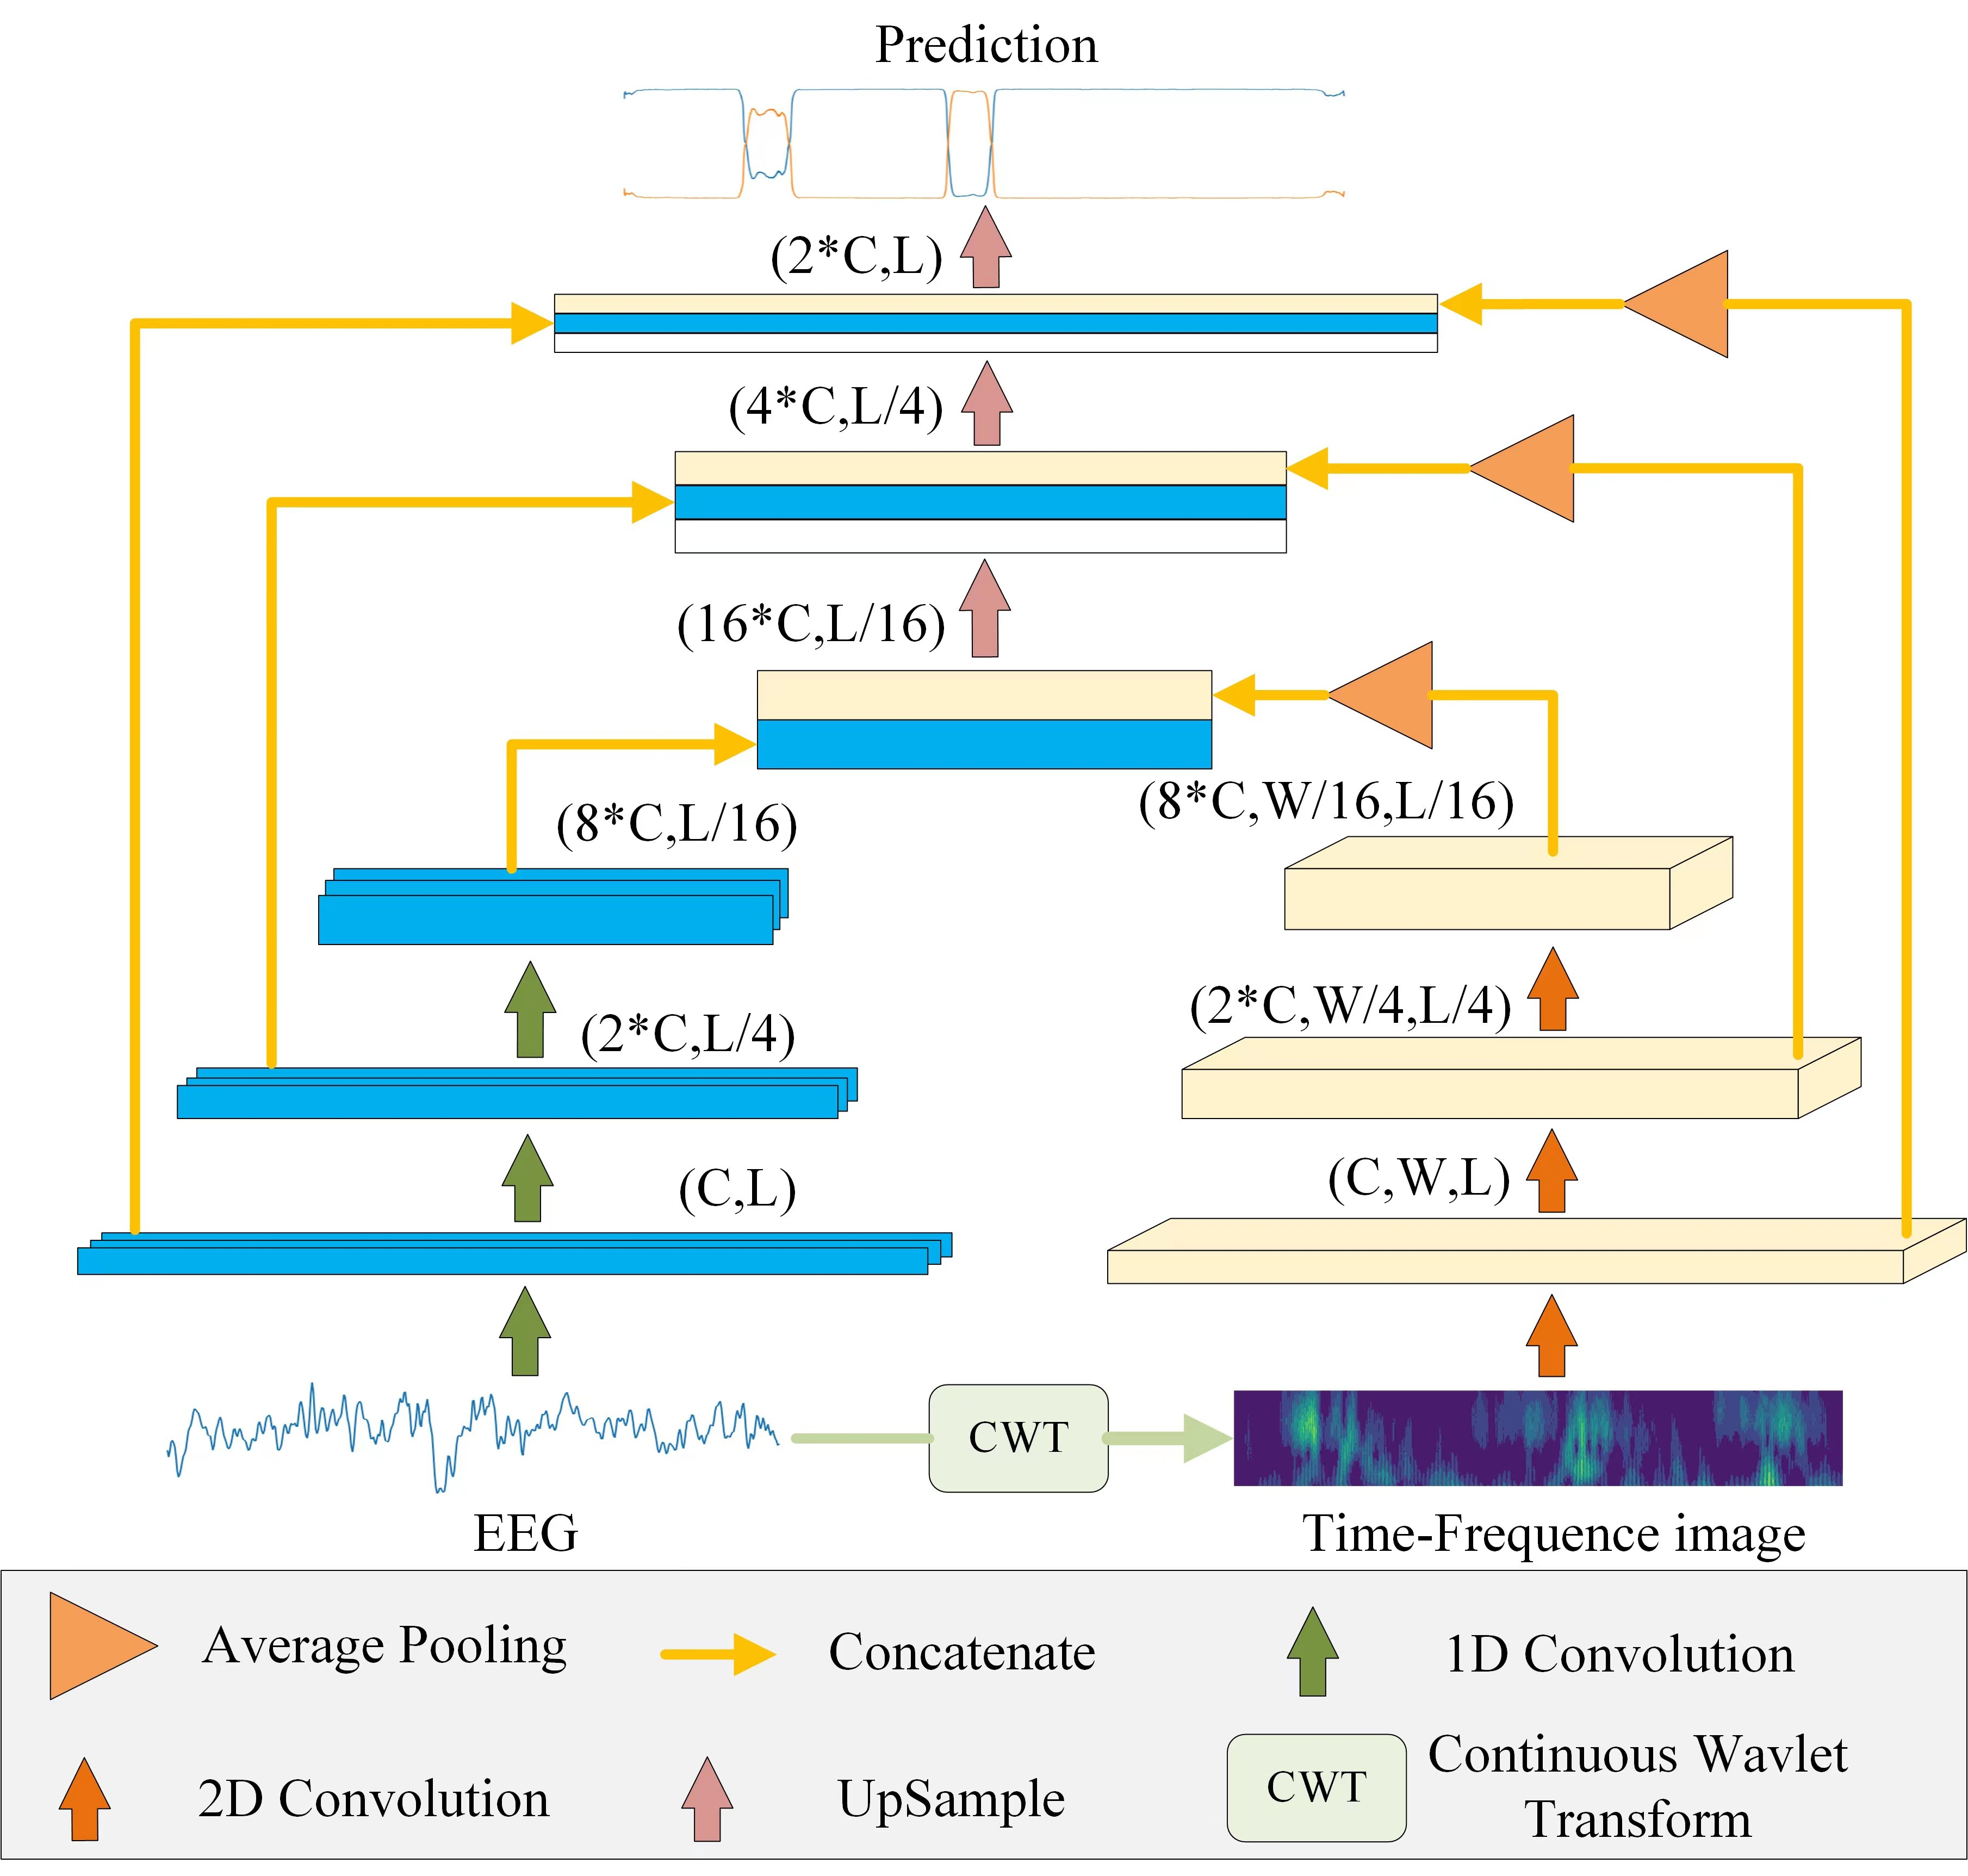
**

**Figure S1. The U-Net model integrating time domain and the time-frequency domain**

**Table S1. The validation of different models**

| IOU=0.4 | Accuracy | Recall | F1 Score |
| --- | --- | --- | --- |
| A7 | 71% | 73% | 72% |
| SUMO | 85% | 79% | 82% |
| Automated real-time | 83% | 78% | 81% |
| TransU+time domain | 83% | 78% | 80.5% |
| **TransU+time domain**  **+time-frequency domain** | **84%** | **81.5%** | **82.7%** |

**Notes:**

IOU, Intersection over Union; TransU, transformer+U-net. Key information about the U-net model integrating time domain and the time-frequency domain is highlighted in bold.
